# Supplementary material for: Ultrasmall SnO2 nanocrystals embedded in porous carbon as potassium ion battery anodes with long-term cycling performance
Source: Royal Society of Chemistry journal article supplement (doi:10.1039/d0nj00323a), 2020-01-01
Supplement: d0nj00323a1.pdf [file d0nj00323a1.pdf]

## Supporting Information

# Ultrasmall SnO<sub>2</sub> Nanocrystals Embedded in Porous Carbon as Potassium Ion Battery Anodes with Long-Term Cycle Life

Shaochuan Luo<sup>†a,b</sup>, Tianyi Wang<sup>†c</sup>, Hongyan Lu<sup>c</sup>, Xiaoqian Xu<sup>c</sup>, Gi Xue<sup>c</sup>, Nan Xu<sup>b</sup>, Yong Wang<sup>a,\*</sup>  
and Dongshan Zhou<sup>c,\*</sup>

<sup>a</sup>Guangdong Provincial Key Laboratory of Nano-Micro Material Research, School of Chemical Biology & Biotechnology, Peking University Shenzhen Graduate School, Shenzhen 518055, China.

<sup>b</sup>School of Environment and Energy, Peking University Shenzhen Graduate School, Shenzhen 518055, China

<sup>c</sup>Department of Polymer Science and Engineering, School of Chemistry and Chemical Engineering, Shenzhen R&D Center, State Key Laboratory of Coordination Chemistry, Nanjing University, Nanjing 210023, China

<sup>†</sup> These authors contributed equally to this work.

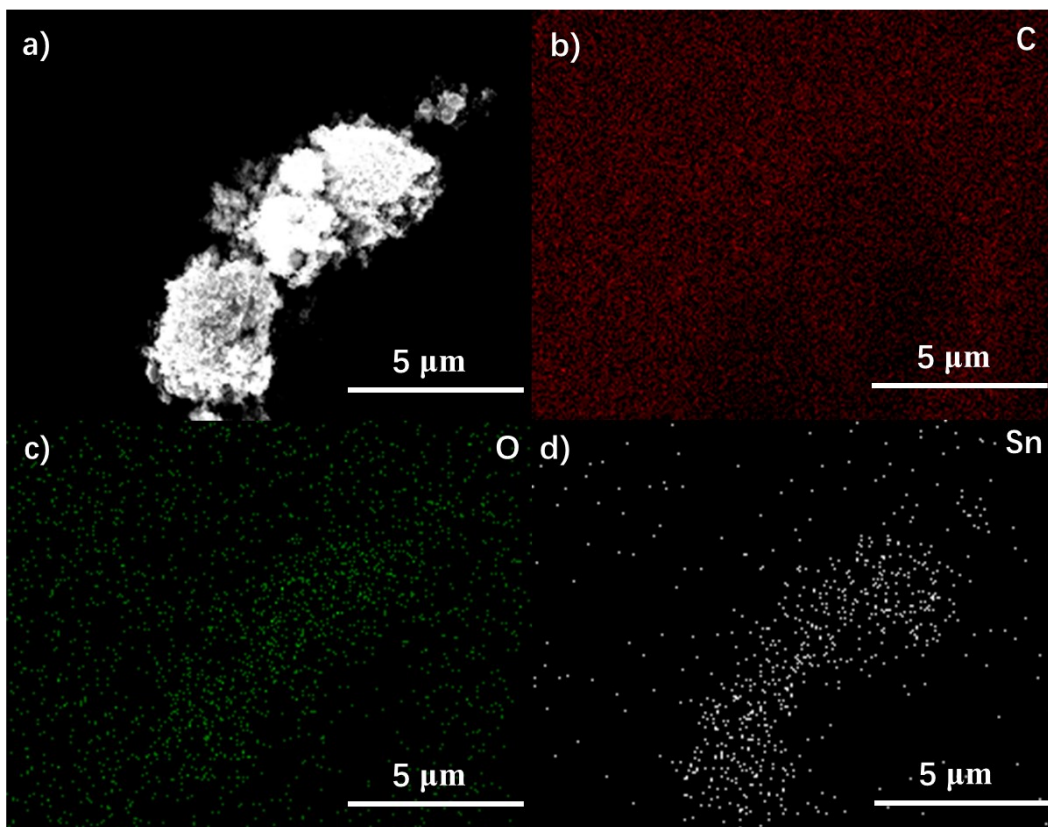

Fig. S1 SEM image and EDX analysis of the as-prepared SnO<sub>2</sub> NC@C sample. a) SEM image. b) Carbon, c) oxygen and d) tin element mapping images of SnO<sub>2</sub> NC@C sample.

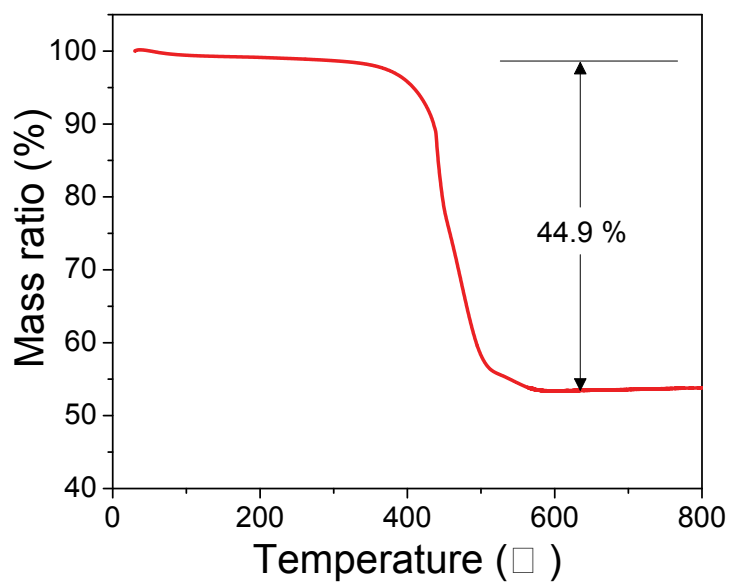

Fig. S2 TGA curves of SnO<sub>2</sub> NC@C powder. TGA measurement was carried out from 25 °C to 800 °C under air atmosphere with a heating rate of 10 °C min<sup>-1</sup>.

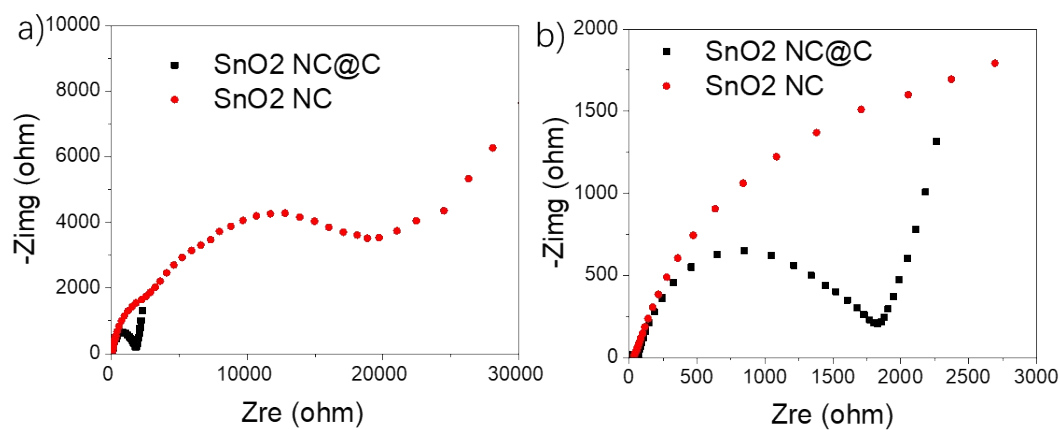

Fig. S3 Impedance of the SnO<sub>2</sub> NC and SnO<sub>2</sub> NC@C cells. EIS measurements were carried out at room temperature in two-electrode 2032 coin-type half-cells. b) is the magnification of a).

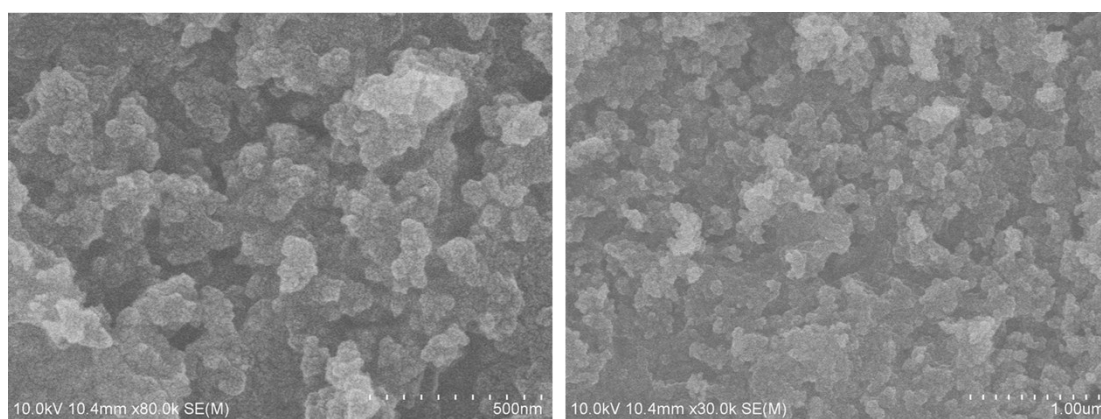

Fig. S4 SEM images of SnO<sub>2</sub> NC@C electrode after 1000 cycles at a current density of 1 A g<sup>-1</sup>

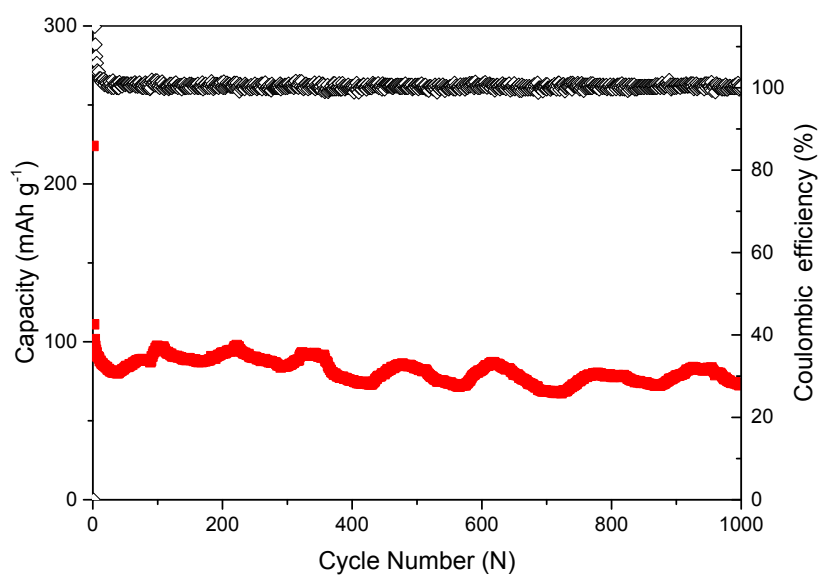

Fig. S5 Cycling performance of carbon at a current density of 1 A g<sup>-1</sup>.

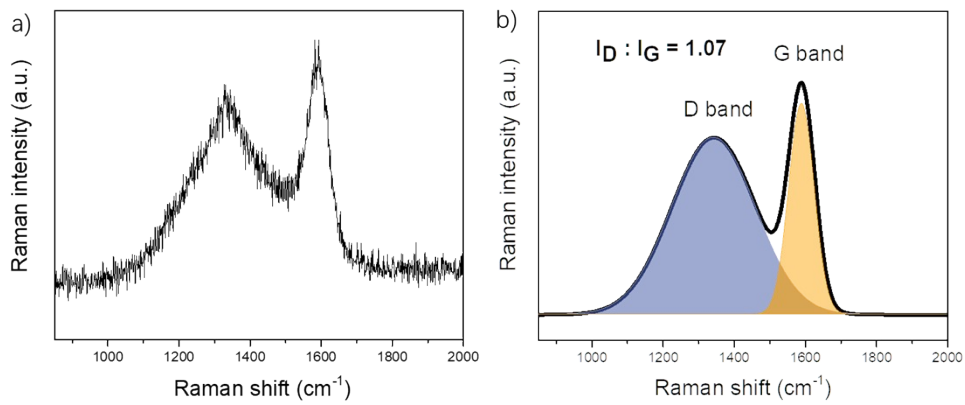

Fig. S6 Raman spectra of SnO<sub>2</sub> NC@C composite. I<sub>D</sub> : I<sub>G</sub> = 1.07.

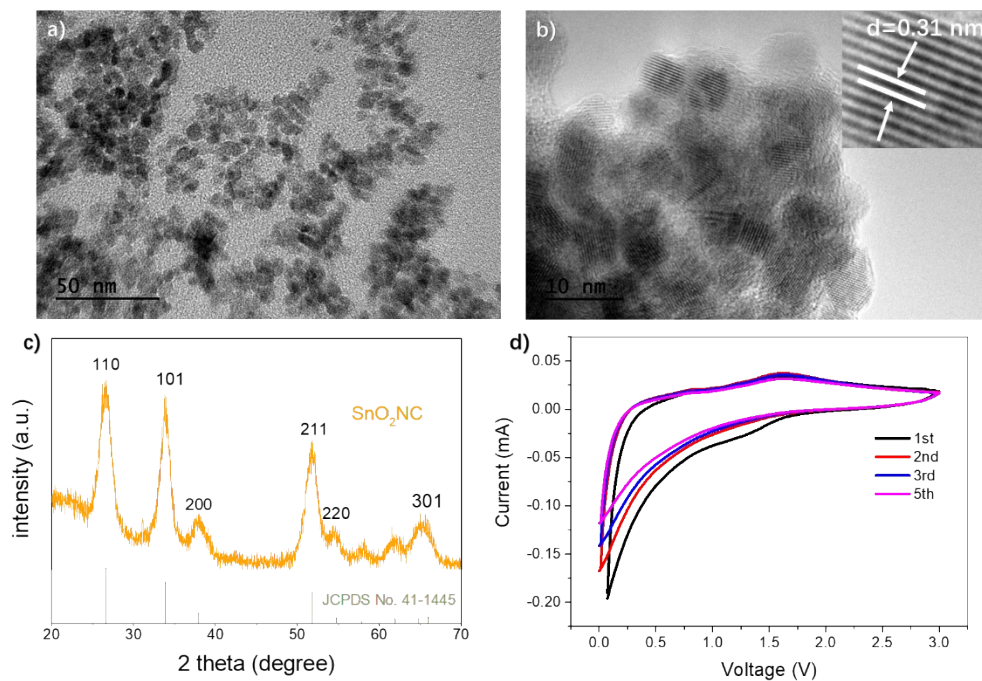

Fig. S7 Characterization of SnO<sub>2</sub> NC. a), b) HRTEM images, c) XRD patterns, d) CV curve of SnO<sub>2</sub> NC.

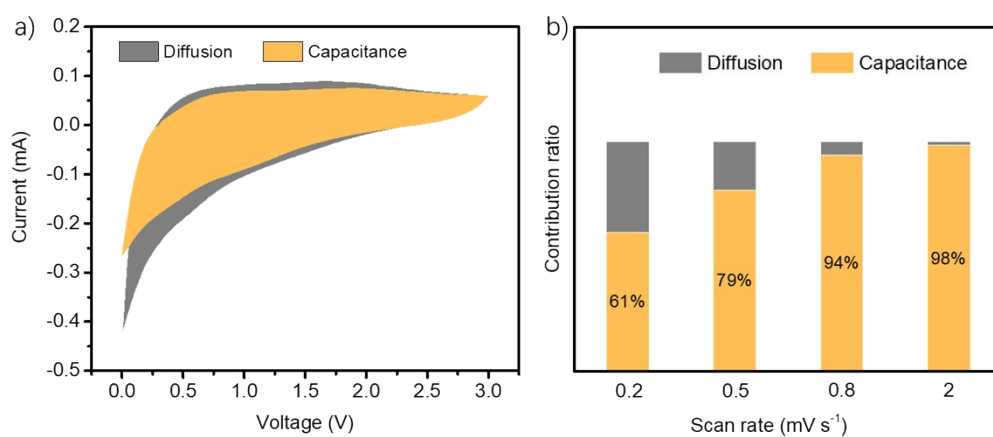

Fig. S8 a) Capacitance contribution of SnO<sub>2</sub> NC@C electrode at 0.5 mV s<sup>-1</sup>; b) The diffusion and capacitance controlled of SnO<sub>2</sub> NC@C electrode at different rates from 0.2 mV s<sup>-1</sup> to 2 mV s<sup>-1</sup>.
